# Supplementary material for: Colloidal crystals of compliant microgel beads to study cell migration and mechanosensitivity in 3D
Source: Royal Society of Chemistry journal article supplement (doi:10.1039/c9sm01226e), 2019-01-01
Supplement: c9sm01226e7.pdf [file c9sm01226e7.pdf]

1 **Electronic Supporting Information for:**

2 **Colloidal crystals of compliant microgel beads to study cell migration and**  
3 **mechanosensitivity in 3D**

4 Katrin Wagner<sup>1</sup>, Salvatore Girardo<sup>1,2</sup>, Ruchi Goswami<sup>1,2</sup>, Gonzalo Rosso<sup>1,2,3</sup>, Elke Ulbricht<sup>1</sup>, Paul  
5 Müller<sup>1,2</sup>, Despina Soteriou<sup>2</sup>, Nicole Träger<sup>1,4</sup>, Jochen Guck<sup>1,2</sup>

6

7 <sup>1</sup>Center for Molecular and Cellular Bioengineering, Technische Universität Dresden, Tatzberg  
8 47/49, 01307 Dresden, Germany

9 <sup>2</sup>Max-Planck-Institut für die Physik des Lichts & Max-Planck-Zentrum für Physik und Medizin,  
10 Staudtstr. 2, 91058 Erlangen

11 <sup>3</sup>Institute of Physiology II, University of Münster, Münster, Germany

12 <sup>4</sup>Leibniz-Institut für Polymerforschung Dresden e. V., Hohe Str. 6, 01069 Dresden, Germany

### 13 Theoretical oxygen supply

14 An important parameter to consider in 3D cultures is the oxygen supply, since limitations in  
 15 oxygen can influence cellular behavior such as survival, proliferation and migration <sup>1,2</sup>.  
 16 Computational simulations were used to calculate the amount of oxygen in the 3D colloidal  
 17 crystals in the ibidi  $\mu$ -Slide VI<sup>0.4</sup>. The  $\mu$ -slide has a gas-permeable ibidi polymer coverslip  
 18 bottom (ibidi GmbH), which allows diffusion of O<sub>2</sub> and CO<sub>2</sub> into the cell culture channel. The  
 19 diffusion of gas into the colloidal crystal through the  $\mu$ -slide bottom is described by the  
 20 following equations:

$$21 \quad \frac{\partial c_i}{\partial t} + \nabla \cdot (-D_i \nabla c_i) = R_i \quad (1)$$

$$22 \quad N_{O,C} = P \cdot \left( p_g - \frac{c}{X_{O_2}} \right) \quad (2)$$

$$23 \quad R_i = -\frac{1}{Y_{X/O_2}} \cdot \mu \cdot C_x(t) \quad (3)$$

$$24 \quad \mu = \mu_{max} \cdot \frac{C_s}{K_{mS} + C_s} \cdot \frac{C_{O_2}}{K_{mO} + C_{O_2}} = \mu_{max} \cdot \frac{C_{O_2}}{K_{mO} + C_{O_2}} \quad (4)$$

$$25 \quad C_x(t) = \frac{n_{cell}}{A \cdot H_1} \cdot \exp \left( \mu_{max} \cdot \frac{C_{O_2}}{K_{mO} + C_{O_2}} \cdot t \right) \quad (5)$$

$$26 \quad R_i = -OCR \cdot \frac{C_{O_2}}{K_{mO} + C_{O_2}} \cdot \frac{n_{cell}}{A \cdot H_1} \cdot \exp \left( \mu_{max} \cdot \frac{C_{O_2}}{K_{mO} + C_{O_2}} \cdot t \right) \quad (6)$$

27 where  $N_{O,C}$  is the inward flux of oxygen through the plastic bottom,  $R_i$ , an oxygen consumption  
 28 rate (including cell proliferation). A simple Monod kinetic with substrate inhibition was chosen  
 29 for cell proliferation (equ. (3), (4)), where oxygen was assumed to be the only limiting  
 30 substrate <sup>3,4</sup>.  $\mu_{max}$  was defined as the maximal cell growth rate,  $C_x(t)$  as cell growth by  
 31 proliferation and  $Y_{X/O_2}$  the yield of cells per unit oxygen which was related to the oxygen  
 32 consumption rate (OCR) per cell ( $\frac{1}{Y_{X/O_2}} = OCR$ ). Implementing the doubling time of 20 h for  
 33 NIH3T3 fibroblasts into equ. (5), a maximal growth rate  $\mu_{max} = 9.627 \cdot 10^{-6} \text{ s}^{-1}$  was  
 34 determined. Other parameters used for simulations are defined in Table 1. We used COMSOL  
 35 Multiphysics 5.2 to estimate whether oxygen gradients were generated in our colloidal crystals  
 36 by changing the diffusion coefficient,  $D$ , and cell concentration,  $n_{cell}$  (Figure 2B-D). To confirm  
 37 a correct model implementation a diffusion coefficient four times smaller than the diffusion  
 38 coefficient at 37°C ( $D \ll D_{O_2}$ ) was used that established an oxygen concentration gradient  
 39 over the channel height and over time (Figure 2B). The gradients were caused by inhibited  
 40 oxygen diffusion through the bottom of the channel and slow diffusion through the channel  
 41 volume to replace the oxygen consumed by cells. When implementing  $D_{O_2}$  for oxygen in  
 42 medium at 37°C <sup>5</sup> and 20,000 cells heterogeneously distributed in the channel volume, an  
 43 oxygen gradient over time was established (Figure 2C). Oxygen concentration reached  
 44 0.078 mol/m<sup>3</sup> after 27 h, which was still above reported hypoxic conditions ( $\sim 0.02 \text{ mol/m}^3$   
 45 <sup>6</sup>). This result suggested that a sufficient oxygen gradient can be established in our scaffolds.  
 46 By decreasing the cell amount to 10,000 cells per channel, the established oxygen  
 47 concentration gradient was even smaller (Figure 2D), which was expected with a correct  
 48 model implementation.

49 Table 1: Parameters for oxygen simulation performed in COMSOL Multiphysics 5.2

| Parameter | Value | Unit | Definition |
|-----------|-------|------|------------|
|-----------|-------|------|------------|

|             |                        |                                 |                                                                       |
|-------------|------------------------|---------------------------------|-----------------------------------------------------------------------|
| $D_{O_2}$   | $2.69 \cdot 10^{-9}$   | $[m^2/s]$                       | Oxygen diffusion coefficient in medium at $37^\circ C$ <sup>5</sup>   |
| OCR         | $1.19 \cdot 10^{-17}$  | $[mol/(s)]$                     | Oxygen consumption rate (OCR) per fibroblast <sup>7</sup>             |
| $n_{cell}$  | 10,000<br>20,000       |                                 | Cell number                                                           |
| A           | 38                     | $[mm^2]$                        | Considered area of channel bottom                                     |
| $H_1$       | 400                    | $[\mu m]$                       | Liquid height (i.e. channel height)                                   |
| P           | $1.1193 \cdot 10^{-7}$ | $[mol/(m^2 \cdot s \cdot bar)]$ | Permeability at $23^\circ C$ (personal communication with ibidi GmbH) |
| $H_2$       | 170                    | $[\mu m]$                       | Membrane thickness                                                    |
| $X_{O_2}$   | 1.053                  | $[mol/(m^3 \cdot bar)]$         | Mole fraction solubility                                              |
| $p_g$       | 0.21                   | $[bar]$                         | Ambient partial pressure of oxygen                                    |
| $K_{mO}$    | $1.0 \cdot 10^{-3}$    | $[mol/m^3]$                     | Michaelis-Menten Constant for Oxygen <sup>8</sup>                     |
| B           | 3.8                    | $[mm]$                          | Channel width                                                         |
| $D_{small}$ | $2.69 \cdot 10^{-13}$  | $[m^2/s]$                       | Small diffusion coefficient                                           |
| $D_2$       | $1.6 \cdot 10^{-9}$    | $[m^2/s]$                       | Reduced oxygen diffusion coefficient for hydrogels <sup>9</sup>       |

50

51 Considering the established gradients, cellular function should be conserved even at lower  
52 oxygen concentrations for cell culture experiments lasting at least 24 h. Taken together,  
53 modeling the diffusion in the colloidal crystal suggested that cells should theoretically be able  
54 to survive and proliferate in the 3D scaffolds.

55

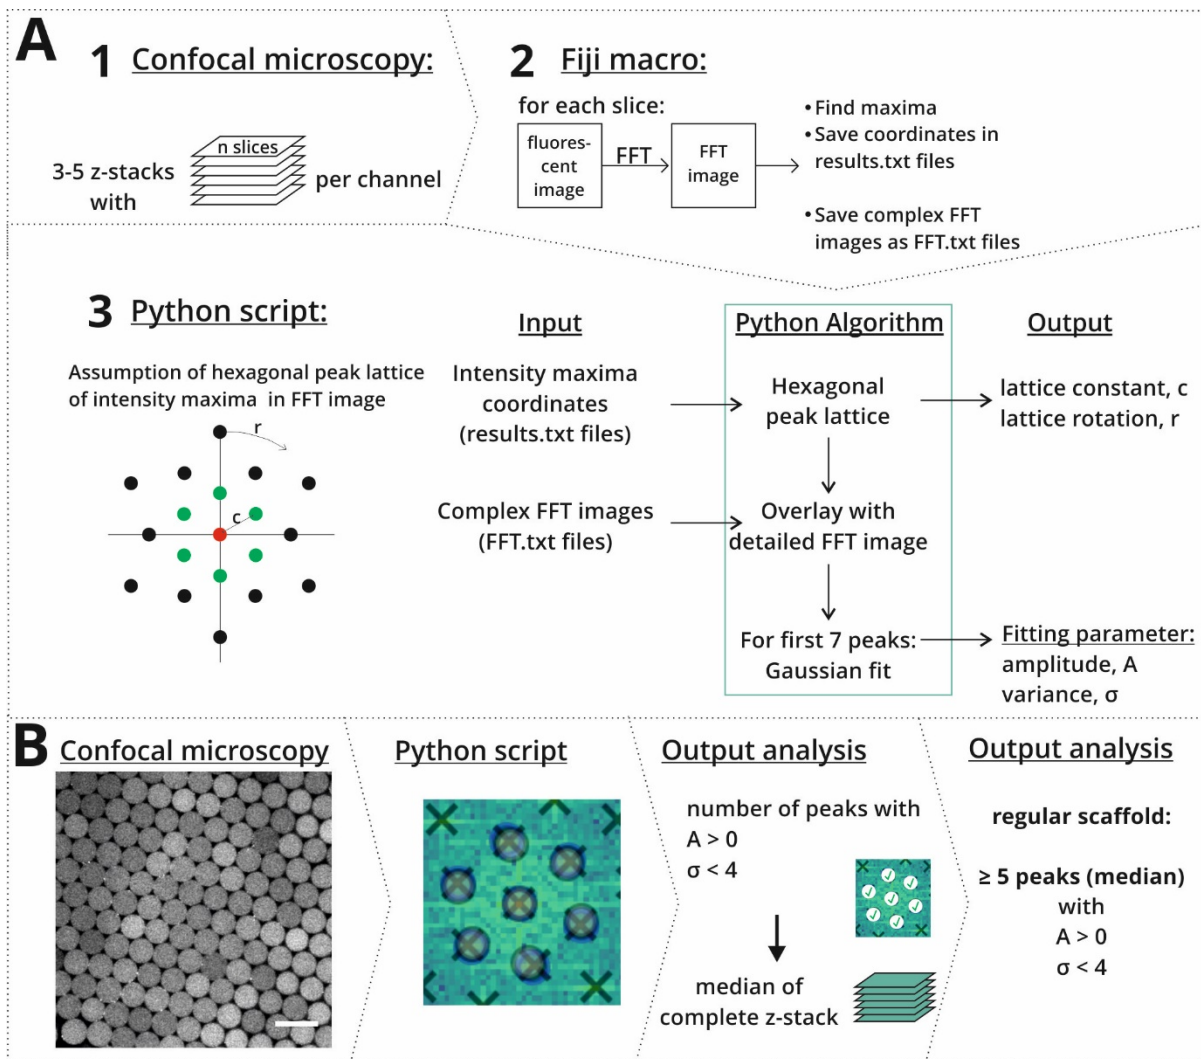

56

57 SI Figure 1: Characterization of 3D microgel bead colloidal crystal regularity. A) Image  
 58 processing work flow. B) Exemplary image processing and output data analysis work flow for  
 59 regular 3D microgel bead colloidal crystals. At least three randomly chosen positions per  
 60 colloidal crystal were imaged by fluorescence confocal microscopy (A-1, B). For each slice of  
 61 the acquired 3D-stacks, a Fast Fourier Transformation (FFT) was performed as regularity  
 62 patterns can be easily recognized in Fourier space. A custom-written macro in FIJI determined  
 63 the intensity maxima in Fourier space and saved the coordinates as well as the complex FFT  
 64 images (A-2). A custom-written Python script determined a hexagonal peak lattice based on  
 65 the intensity maxima and overlaid this peak lattice with the FFT images (A-3, B). The center  
 66 peak is red; the main regularity peaks are green. For the first seven intensity peaks a Gaussian  
 67 fit was performed as these peaks describe the main regularity of the real image. The output  
 68 data were the amplitude,  $A$ , and the variance,  $\sigma$ , of the Gaussian fits for each peak and the  
 69 number of peak fits with  $A > 0$  and  $\sigma < 4$ . This was performed for every slice of the acquired  
 70 z-stacks and the median number of peak fits that fulfilled these requirements was determined  
 71 (see Figure 1E).

72

73

74

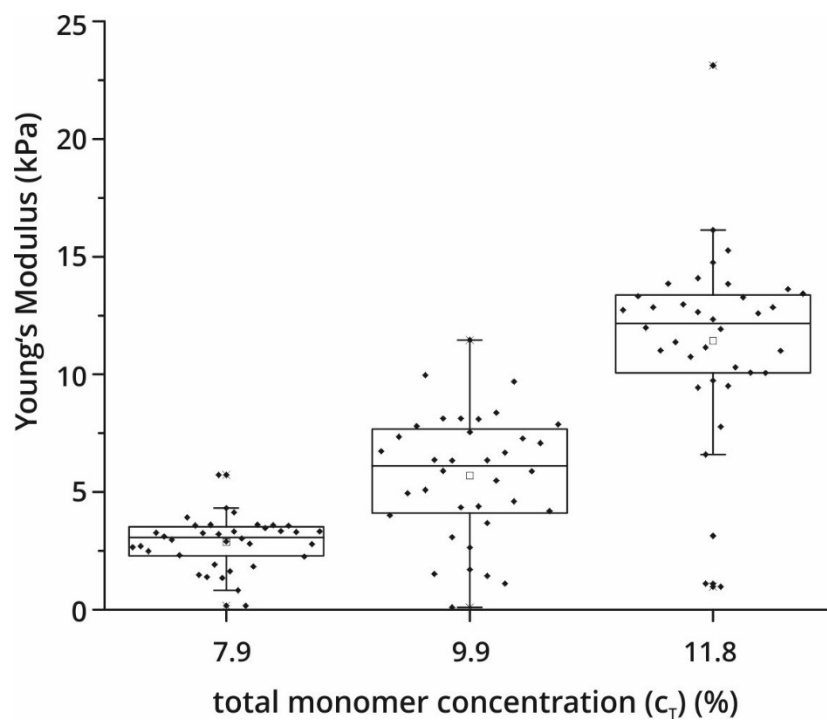

75

76 SI Figure 2: Young's moduli of different PAAm microgel bead batches (varied total monomer  
77 concentration  $c_T$ ) functionalized with Cy5-tagged Poly-L-Lysine (1.34 pg/bead). Young's  
78 modulus was determined by AFM nanoindentation ( $n = 36$  for each composition).

79

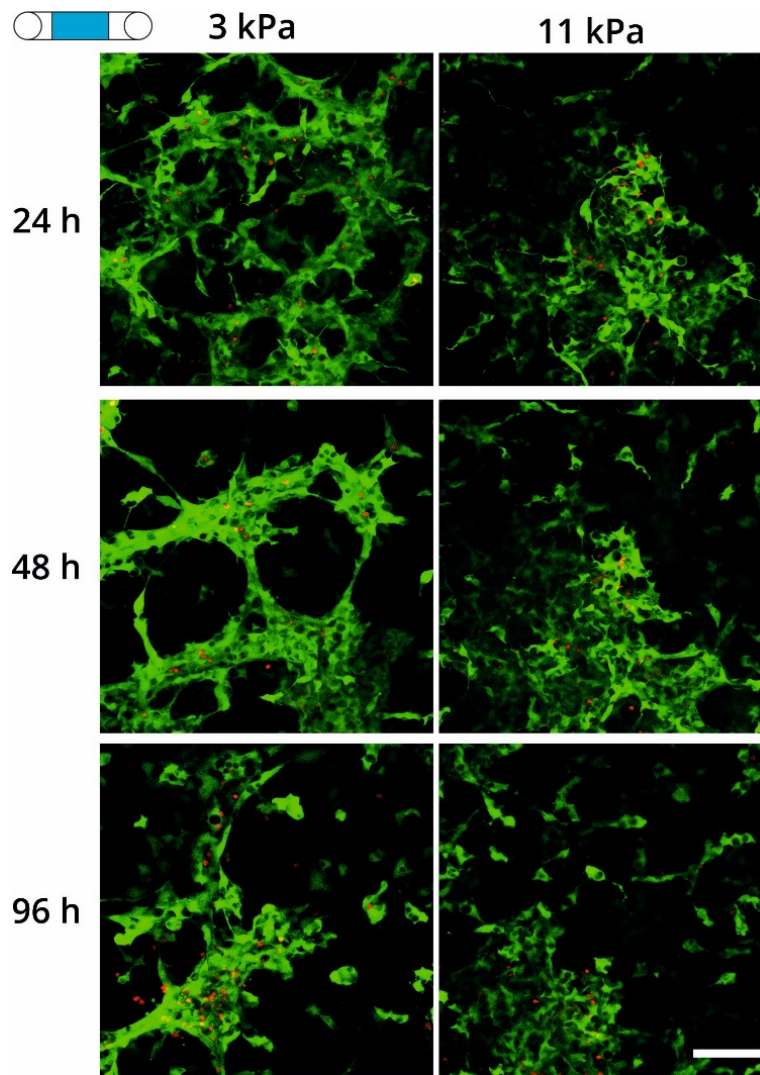

80

81 SI Figure 3: Representative confocal images of fibroblasts randomly seeded in colloidal crystals  
 82 with beads having a mean Young's modulus of 3 kPa or 11 kPa over 96 h. PAAm microgel  
 83 beads had a total monomer concentration ( $c_T$ ) of 7.9% and 11.8%, respectively, and were  
 84 coated with Poly-L-Lysine-Cy5. Medium was replaced daily and supplemented with propidium  
 85 iodide (PI) to monitor cell death. Images show maximum projections. Green: fibroblasts; red:  
 86 nuclei of dead cells (PI). Scale bar: 100  $\mu\text{m}$ .



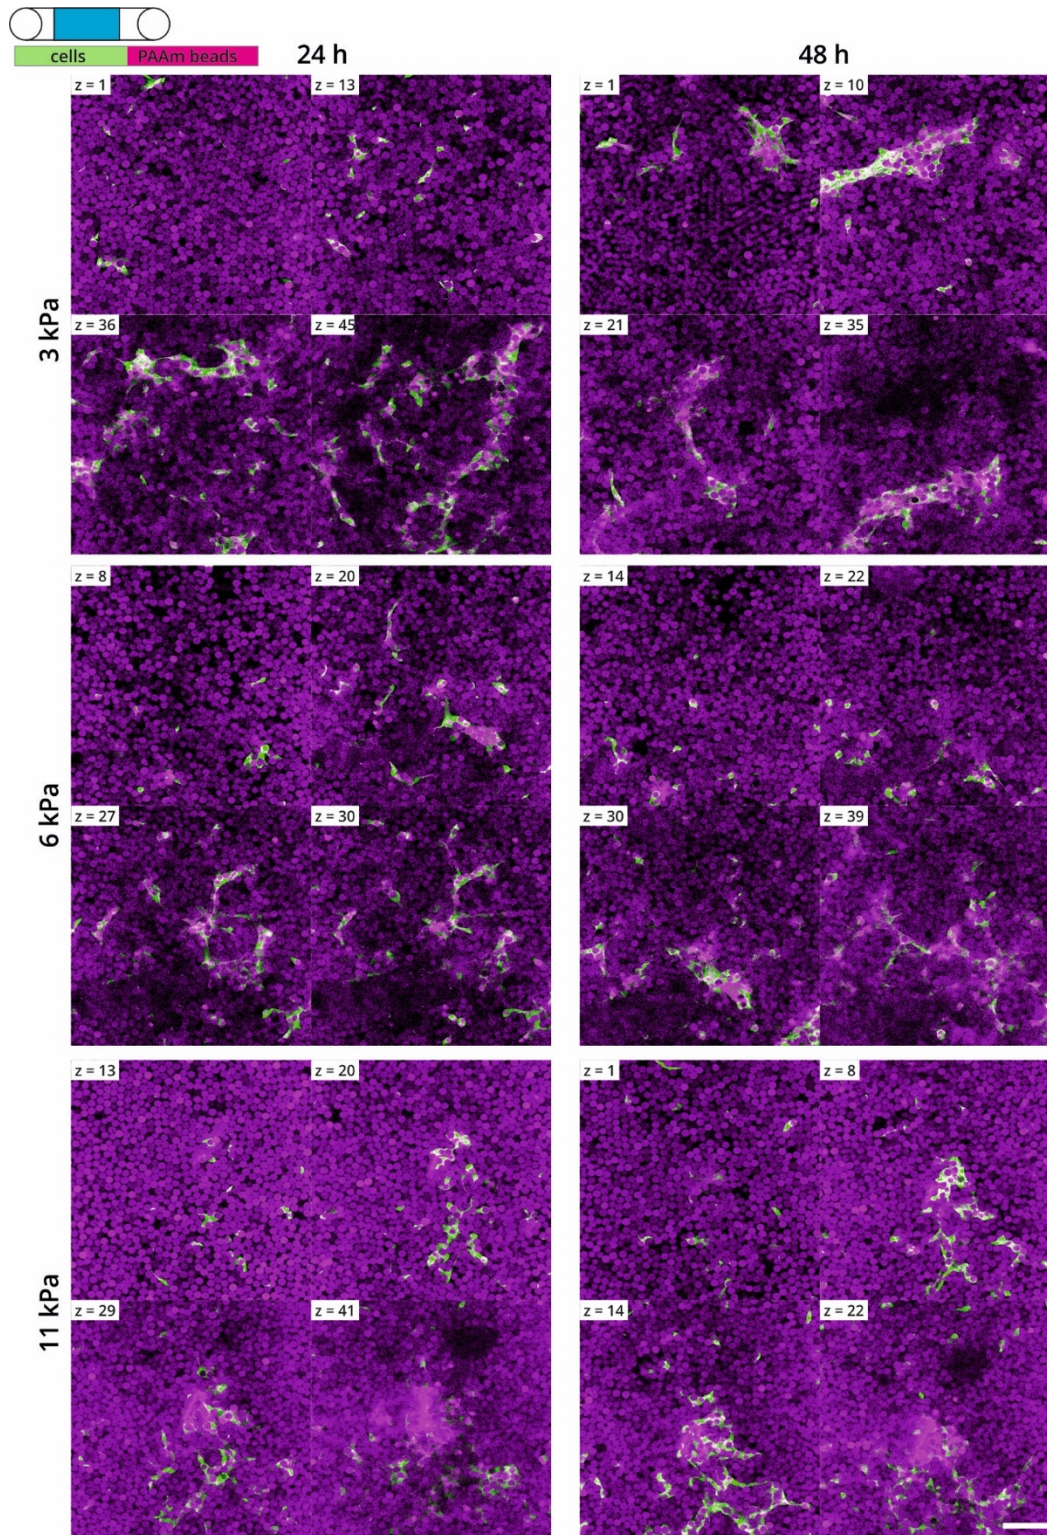

87

88 SI Figure 4: Representative confocal images of NIH3T3/GFP fibroblasts (green) in 3D microgel  
 89 bead colloidal crystals with different stiffness over 48 h. Polyacrylamide (PAAM) microgel  
 90 beads were functionalized with PLL-Cy5 (magenta). Images show single z-slices (z-position is  
 91 indicated in upper left corner of each image). The average Young's modulus of respective  
 92 PAAM bead batches was determined by AFM nanoindentation. 20,000 cells were randomly  
 93 seeded in each channel. Scale bar: 100  $\mu\text{m}$ .

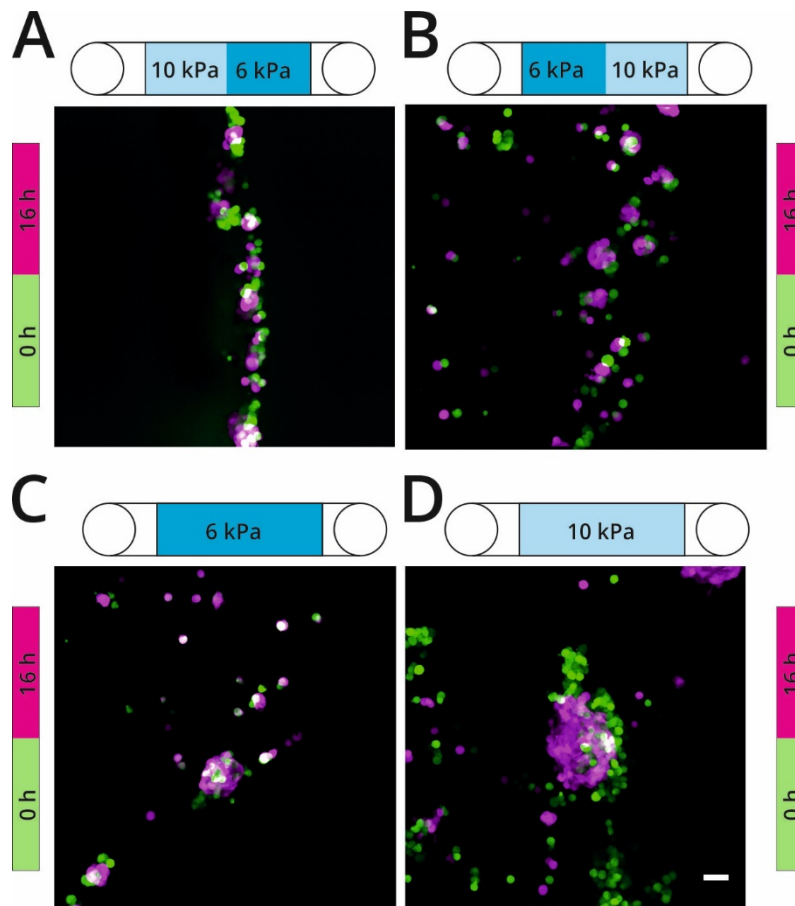

94

95 SI Figure 5: NIH3T3/GFP fibroblasts migrating through non-functionalized colloidal crystals  
 96 overnight. Overlay of maximum projections of fibroblast fluorescence signal with green as  
 97 starting point ( $t = 0$  h) and magenta as end point ( $t = 16$  h). A, B) Colloidal crystal step  
 98 stiffness. C, D) Homogeneous colloidal crystal stiffness. 10,000 cells were seeded. Images  
 99 were acquired with a spinning disk microscope (Andor Dragonfly). Scale bar: 50  $\mu\text{m}$ .

100



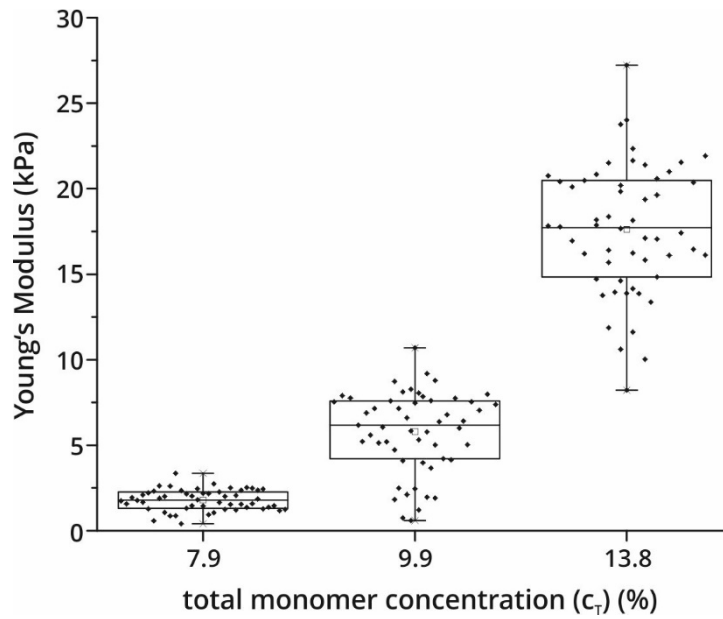

101

102 SI Figure 6: Young's moduli of different PAAm microgel bead batches (varied total  
 103 monomer concentration  $c_T$ ) functionalized with Poly-D-Lysine and laminin. Young's modulus  
 104 was determined by AFM nanoindentation ( $n = 52$  for each composition).

105

106

107

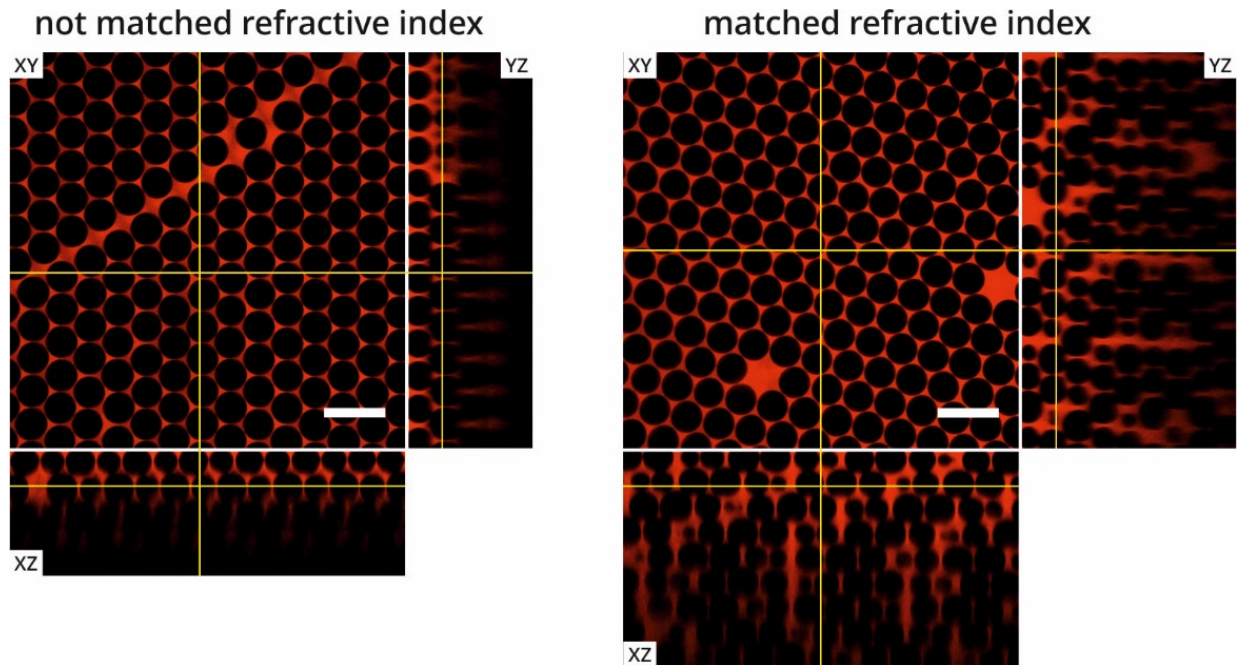

108

109 SI Figure 7: Orthogonal view of PMMA colloidal crystals without refractive index matching  
 110 and with refractive index matching. PMMA beads are black and the interstitial space is filled  
 111 with Rhodamine-6G and 2,2-thiodiethanol. Scale bars: 100  $\mu\text{m}$ .

112

113

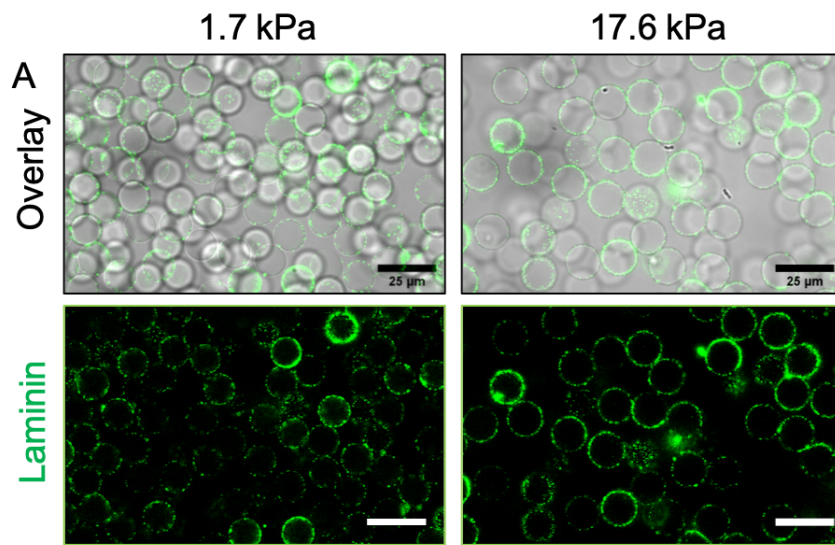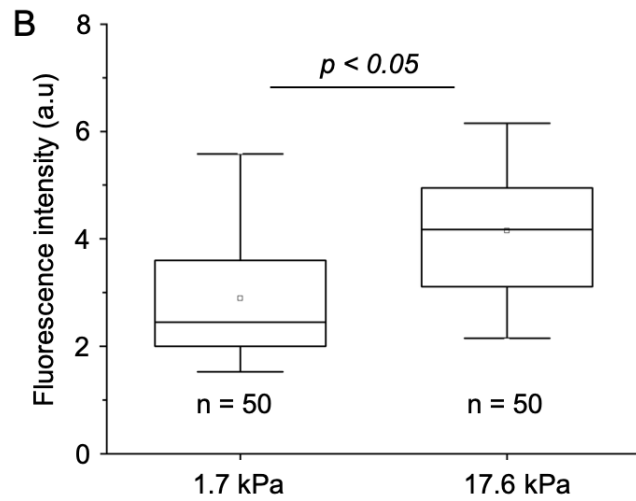

114

115

116 SI Figure 8: Quantification of laminin binding on PAAm beads of different stiffness.  
 117 Fluorescence images in A show the laminin staining (green) on soft (left images) and stiff  
 118 (right images) PAAm beads. Graph in B shows the fluorescence quantification of laminin  
 119 binding. Statistical differences were analysed with Mann-Whitney test.

120

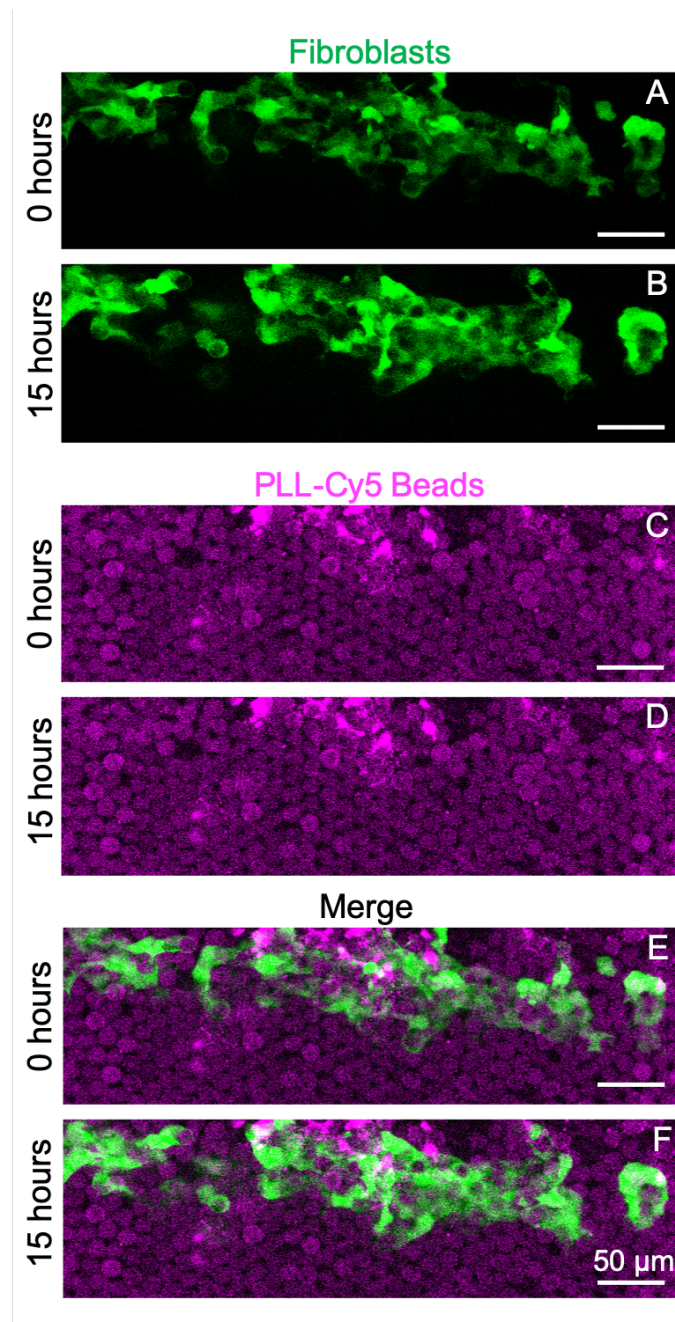

121

122

123 SI Figure 9: Embedding and migration of fluorescently labelled cells in well-organized PAAm-  
 124 bead scaffold. PLL-coated beads in magenta; fibroblasts in green. Top and bottom panels  
 125 show different time points during the experiment: time 0h and 15h respectively. A and B are  
 126 representative images of fibroblasts embedded in microgel beads scaffolds, shown separately  
 127 in C and D. Merged images of fibroblasts and beads are shown in panels E and F.

128

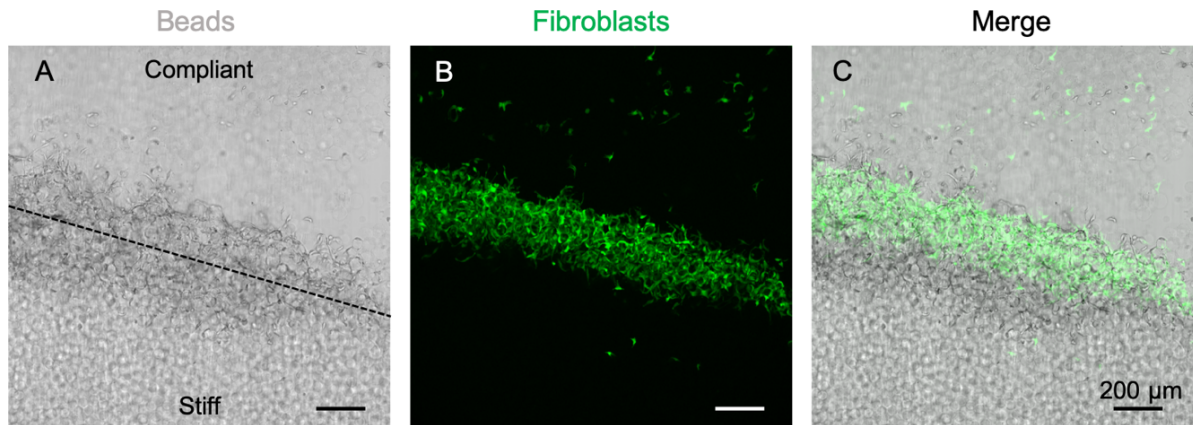

129

130 SI Figure 10: Using transmission light microscopy used to precisely define the interface zone  
 131 between stiff and compliant microbeads. Representative bright field image in A shows the  
 132 interface zone (dashed line) between compliant (top) and stiff (bottom) PAAm beads. Image  
 133 in B shows GFP-labelled fibroblasts (green) embedded in the 3D scaffold. C merged image of  
 134 fibroblasts and beads.

135

136 **Bibliographic references**

137 1 W. G. Taylor, R. F. Camalier and K. K. Sanford, *J. Cell. Physiol.*, 1978, **95**, 33–40.  
 138 2 M. Csete, *Ann. N. Y. Acad. Sci.*, 2005, **1049**, 1–8.  
 139 3 J. Monod, *Annu. Rev. Microbiol.*, 1949, **3**, 371–394.  
 140 4 T. I. Croll, S. Gentz, K. Mueller, M. Davidson, A. J. O'Connor, G. W. Stevens and J. J.  
 141 Cooper-White, *Chem. Eng. Sci.*, 2005, **60**, 4924–4934.  
 142 5 A. Richter, K. K. Sanford and V. J. Evans, *JNCI J. Natl. Cancer Inst.*, 1972, **49**, 1705–  
 143 1712.  
 144 6 N. Korin, A. Bransky, U. Dinnar and S. Levenberg, *Lab Chip*, 2007, **7**, 611.  
 145 7 I. Streeter and U. Cheema, *Analyst*, 2011, **136**, 4013.  
 146 8 B. A. Wagner, S. Venkataraman and G. R. Buettner, *Free Radic. Biol. Med.*, 2011, **51**,  
 147 700–712.  
 148 9 A. C. Hulst, H. J. H. Hens, R. M. Buitelaar and J. Tramper, *Biotechnol. Tech.*, 1989, **3**,  
 149 199–204.

150
